# Supplementary material
Source: PubMed Central journal article supplement (PMC2754932)

## Supplementary Figure Legends

**Supplementary Figure S1.** Genotyping experiments confirm that embryos selected for subsequent experiments were homozygous *udu<sup>tu24</sup>* mutants. (A–E) Somite structures of wild-type embryos and *udu<sup>tu24</sup>* embryos injected with *p53*-MO. (A–B) Wild-type embryos showed somite structures with characteristic chevron-shape and well-defined somite boundaries. (C–D) *udu<sup>tu24</sup>* embryos have somite structures that were not V-shaped and posterior somites that were not clearly defined by boundaries. (E) In *udu<sup>tu24</sup>* embryos injected with *p53*-MO, V-shaped somite structures were restored but not with characteristic chevron-shape. (F) Representative DNA sequence analyses showed nonsense mutation in homozygous *udu<sup>tu24</sup>* mutants in which Tyr has been converted to a STOP codon.

**Supplementary Figure S2.** Somite boundaries highlighted by membrane-localized  $\beta$ -catenin antibody. (A–B) High resolution confocal images of somite boundaries in wild-type and *udu<sup>tu24</sup>* embryos, approximately the 12th to 16th somite region. Somites of wild-type embryos were chevron-shaped with clear boundaries; however, mutant somite boundaries were not clearly defined as indicated by arrows. (C–D) High resolution confocal images of posterior somite boundaries in wild-type and *udu<sup>tu24</sup>* embryos injected with *p53*-MO.

**Supplementary Figure S3.** Segmentation clock is functional in *udu<sup>tu24</sup>* mutants. Expression of *deltaC* in homozygous *udu<sup>tu24</sup>* embryos at 15 hpf (12 ss). *deltaC* expression patterns were arranged in a sequence corresponding to a temporal oscillation in the PSM linked to somitogenesis. The different phases of the oscillation cycle were numbered I, II and III and intermediate phases were designated I+, II+ and III+. All embryos were in dorsal view with anterior to the top.

**Supplementary Table 1.** Gene accession number and primer sequence used in quantitative real-time PCR.

| <b>Gene</b>                   | <b>Accession number</b> | <b>5' sequence</b>    | <b>3' sequence</b>        |
|-------------------------------|-------------------------|-----------------------|---------------------------|
| <i>p53</i>                    | NM_131327               | ACCACAGCTTGGTGCTGAAT  | GCCTGGACATGCACACACA       |
| <i>mdm2</i>                   | AF010255                | TGGAGTCCATCAACTCTGAT  | CGAGGAAGAGGAGGGTTGAAC     |
| <i>cyclin D1</i>              | NM_131025               | GCAGCTTTTAGGAGCAACTT  | CTGAGGCCAGATCCCACCTC      |
| <i>p21<sup>WAF/CIP1</sup></i> | AL912410                | GACTGAGGAATGGATCTTTC  | CTTCATCTGTCTGGAGCTGCAT    |
| <i>caspase 8</i>              | NM_131510               | CCAGACAATCTGGATGAACT  | CATTGTTTCAGATACAGGGTTGTTG |
| <i>bax</i>                    | NM_131562               | GCTGCACTTCTCAACAACCTT | CGGGCCACTCTGATGAAGAC      |
| <i>gadd45a1</i>               | AY714218                | AAGGATGGACTCGGTGATTA  | CCTTCACATCGTCGTCATCAGT    |
| <i>gadd45β1</i>               | AB180735                | AGGAGGTTGTTGGATGCAA   | TCTGGATCCACATTCATGAGTTG   |
| <i>gadd45β2</i>               | AB180736                | GAGGATCTGGACGACATT    | TGAGAGTTAGTGACGAGGATGCA   |
| <i>atm</i>                    | AJ605775                | ACGAGCTAATCTGTCAGTCA  | TTCTGCCCCTCCAAGTC         |
| <i>atr</i>                    | CT623247                | ATGGTCACTGACAACAAGCT  | GCGGCCAGCTTTTTCAAAT       |
| <i>chk1</i>                   | CB363820                | TGCGTTAACAACCGCTTCA   | TTTTGCCATGTCCACAACCTT     |
| <i>chk2</i>                   | AF265346                | AGCGTGCTCAATTGCACAGA  | TCGTCTGCCACCCATGTG        |
| <i>elf1a</i>                  | NM_131263               | TGGAAATTCGAGACCAGCAA  | TCACGGGTCTGTCCGTTCTT      |



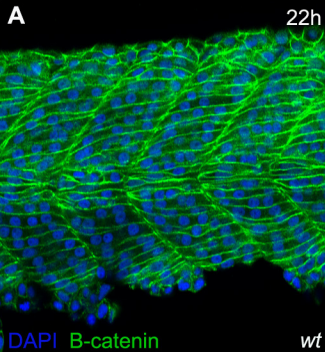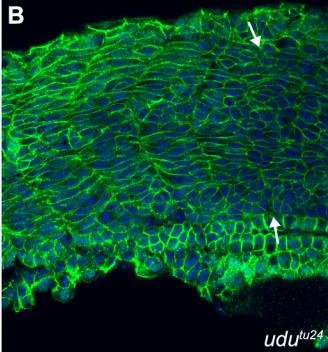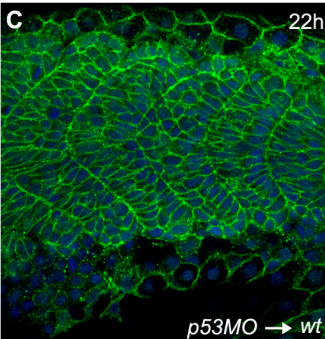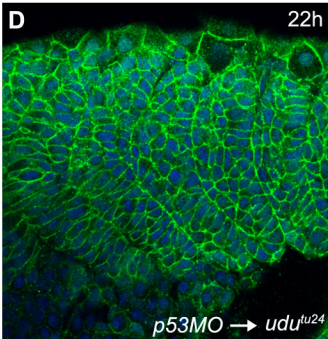

15h, *deltaC/udu*<sup>tu24</sup>

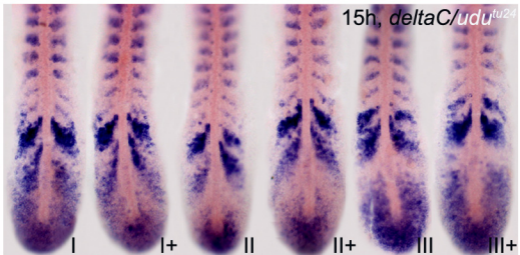

Supplement: E09-02-0109_1.pdf [file E09-02-0109_1.pdf]
